# Supplementary material for: Air-permeable, multifunctional, dual-energy-driven MXene-decorated polymeric textile-based wearable heaters with exceptional electrothermal and photothermal conversion performance
Source: Royal Society of Chemistry journal article supplement (doi:10.1039/d0ta03048a), 2020-01-01
Supplement: d0ta03048a1.pdf [file d0ta03048a1.pdf]

## Supplementary Information

### **Air-permeable, multifunctional, dual-energy-driven MXene-decorated polymeric textile-based wearable heater with exceptional electrothermal and photothermal conversion performance**

*Xiaoya Liu<sup>a#</sup>, Xiuxiu Jin<sup>b#</sup>, Lei Li<sup>a</sup>, Jianfeng Wang<sup>a, c\*</sup>, Yanyu Yang<sup>a</sup>, Yanxia Cao<sup>a</sup>, Wanjie Wang<sup>a\*</sup>*

<sup>a</sup> College of Materials Science and Engineering, Henan Key Laboratory of Advanced Nylon Materials and Application, Zhengzhou University, Zhengzhou 450001, China

<sup>b</sup> Henan Provincial People's Hospital, Henan Eye Hospital, Henan Eye Institute, People's Hospital of Zhengzhou University, Zhengzhou, Henan, 450003, China

<sup>c</sup> The State Key Laboratory of Polymer Materials Engineering, Polymer Research, Institute of Sichuan University, Chengdu 610065, China

<sup>#</sup> XY Liu and XX Jin contribute equally to this work.

---

\* To whom correspondence should be addresses. (Prof. Wang, Email: [jfw@zzu.edu.cn](mailto:jfw@zzu.edu.cn), Fax: 86-0371-67781590 )

\* To whom correspondence should be addresses. (Prof. Wang, Email: [wwj@zzu.edu.cn](mailto:wwj@zzu.edu.cn), Fax: 86-0371-67781590)

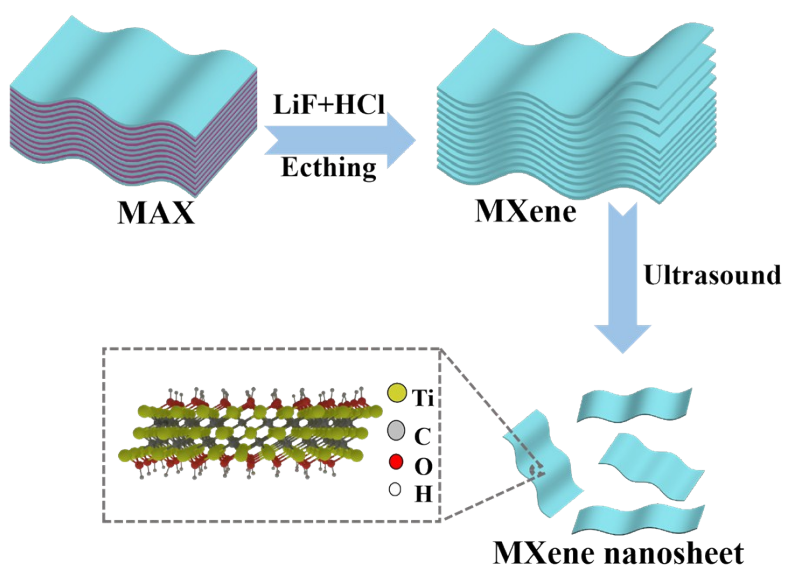

**Fig. S1** Schematic illustration of the process for etching  $\text{Ti}_3\text{C}_2\text{Tx}$  MXene.

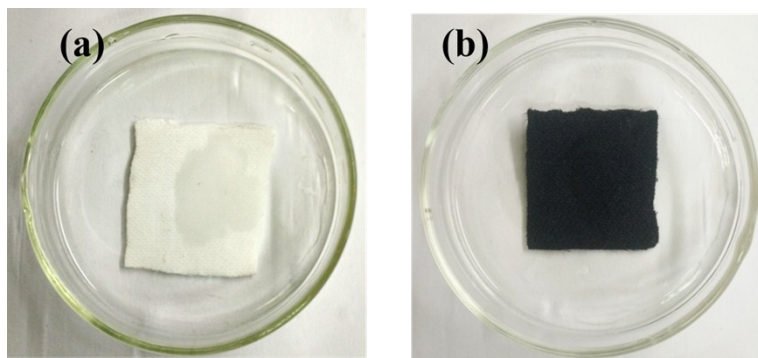

**Fig. S2** Digital images of sample after sterilization: a) pristine textile and b) M-textile.

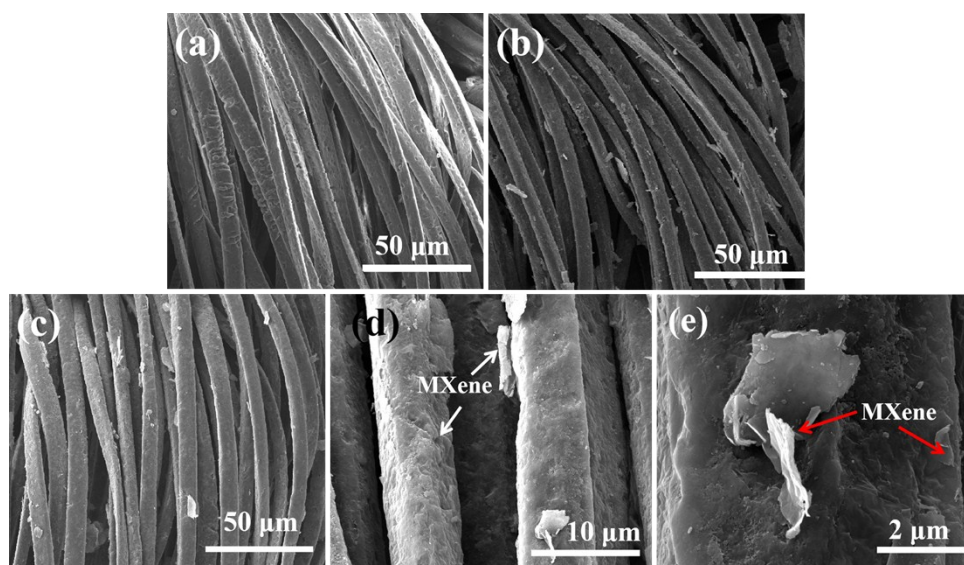

**Fig. S3** SEM images of a) pristine textile, b) M-textile-17.3, c), d) and e) M-textile-4.7 at low and high magnification, respectively.

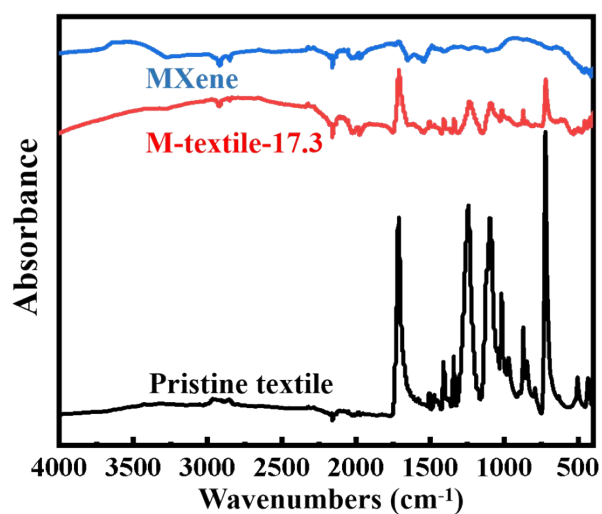

**Fig. S4** ATR-IR spectra of the  $\text{Ti}_3\text{C}_2\text{T}_x$ , pristine textile, M-textile with different MXene content, respectively.

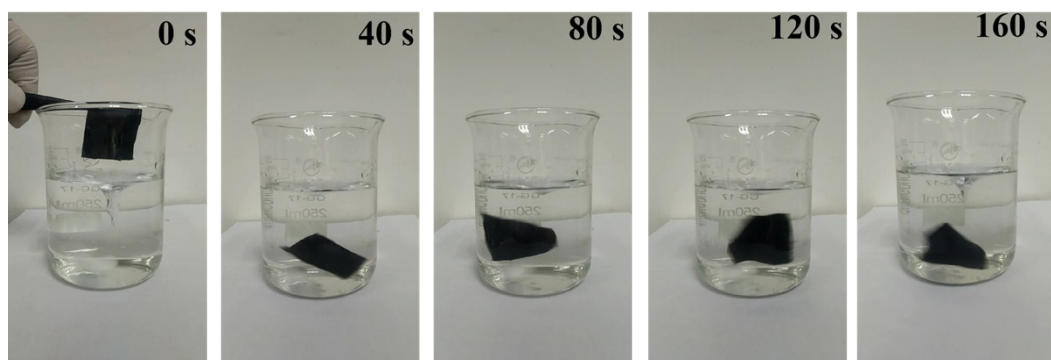

**Fig. S5** Digital images of the mechanical washing process of M-textile-17.3.

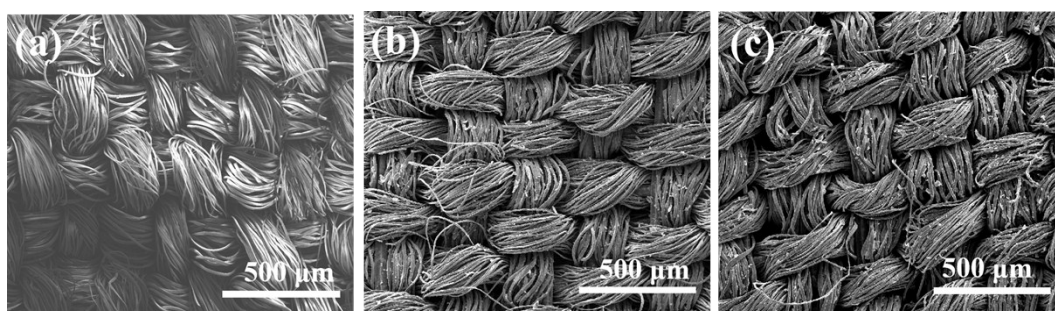

**Fig. S6** SEM images of a) pristine textile, b) M-textile-4.7, and c) M-textile-17.3 at high magnification.

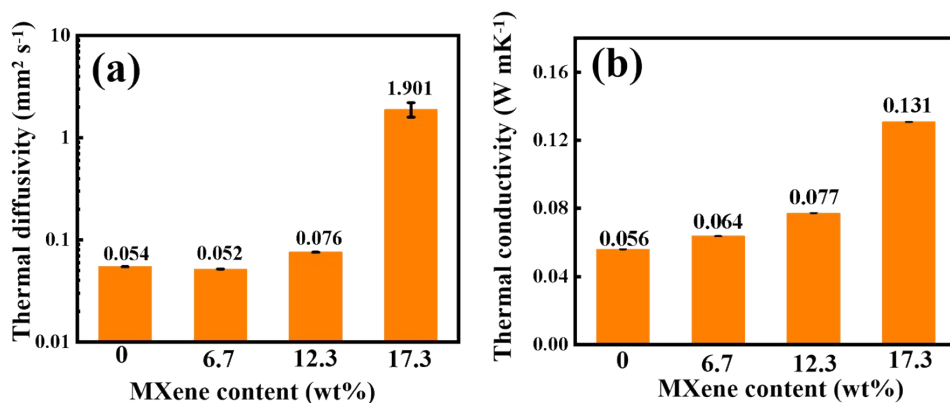

**Fig. S7** a) Thermal diffusivity and b) thermal conductivity of pristine textile and M-textile with different MXene content, respectively.

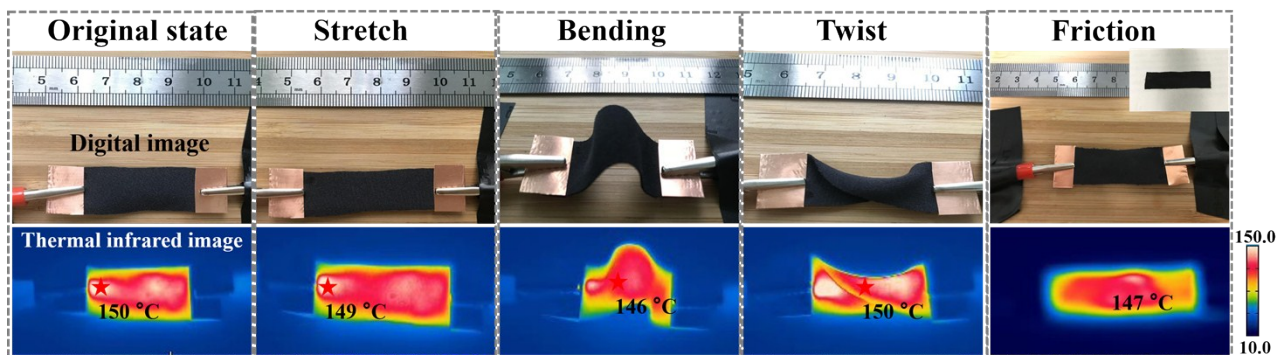

**Fig. S8** Joule heating performance of M-textile-17.3 in the state of stretch ( $\sim 120\%$ ), bending, twist or after one thousand time of friction on a paper.

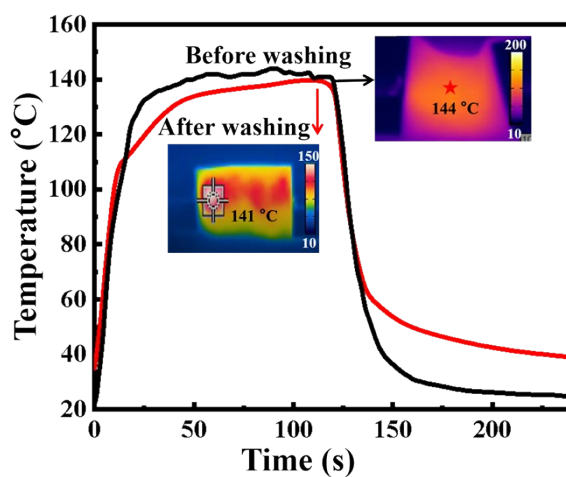

**Fig. S9** Electrical heating performance (temperature rise curve and IR image at saturated temperature) of M-textile-17.3 textile at 3V before and after machine washing for 100 minutes.

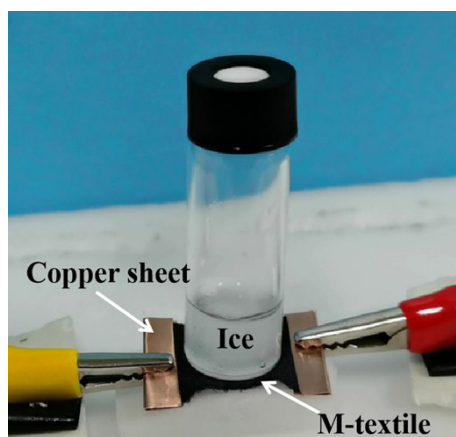

**Fig. S10** Schematic diagram of electric heating deicing device based on M-textile.

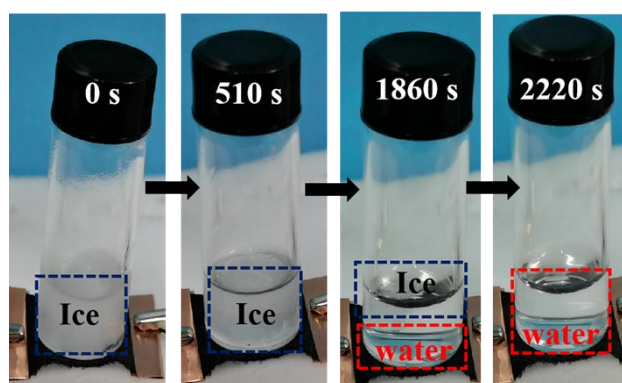

**Fig. S11** Digital image of deicing process without applying voltage.

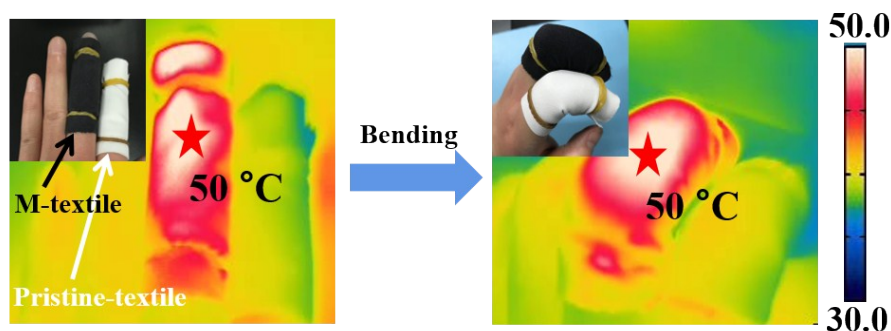

**Fig. S12** IR images of straight and bended figures wrapped with M-textile and pristine textile during FIR light irradiating at a distance of 20 cm.

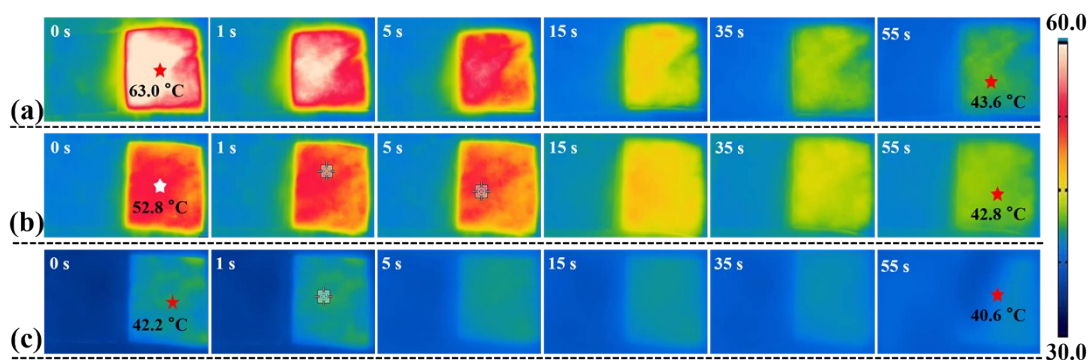

**Fig. S13** IR images of the M-textile-17.3 after shading the sunlight at different time: a) 12 AM, b) 3 PM and c) 5 PM (May 2, Zhengzhou, China).

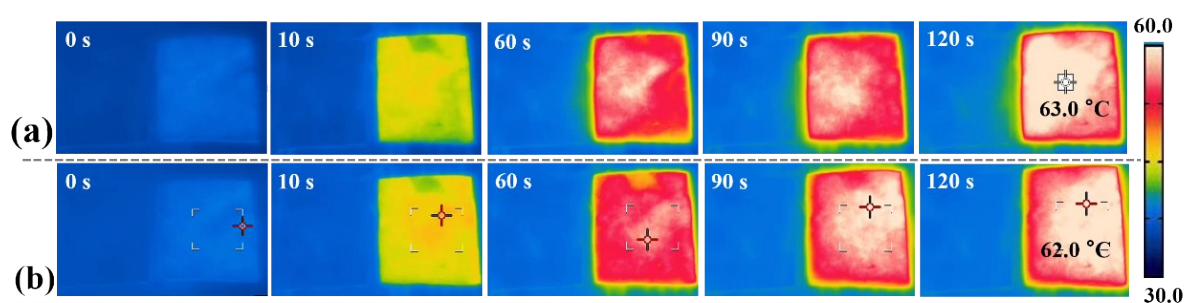

**Fig. S14** IR images of a) 1st and b) 20th cyclic photothermal conversion performance of M-textile-17.3 including exposing to sunlight (2 min) and then shading sunlight (2 min) at 12 AM.

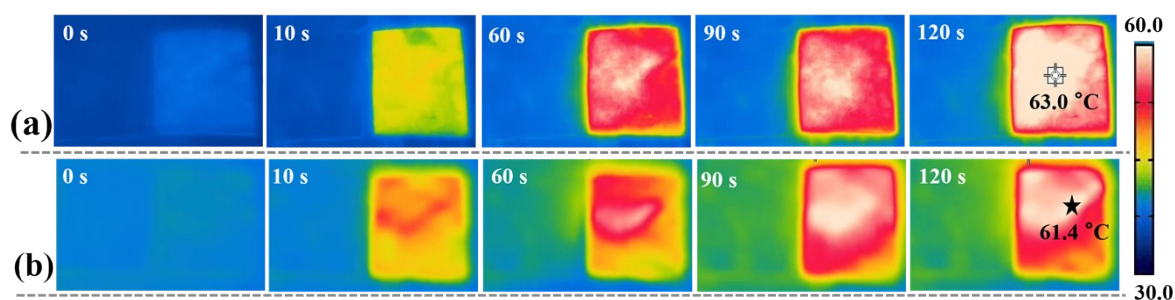

**Fig. S15** IR images of the M-textile-17.3 exposed to sunlight at 12 AM a) before and b) after machine washing of 100 minutes.

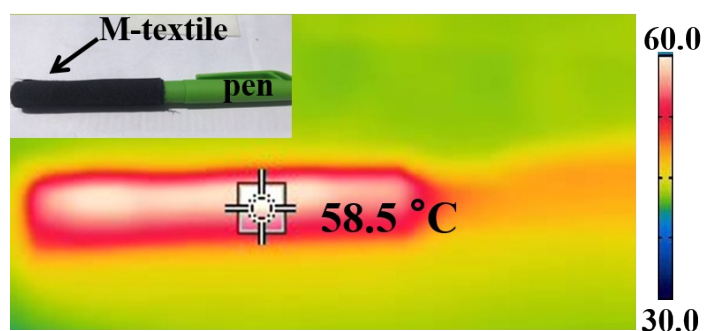

**Fig. S16** IR images of a pen wrapped with M-textile-17.3 irradiated by sunlight at 12 AM.

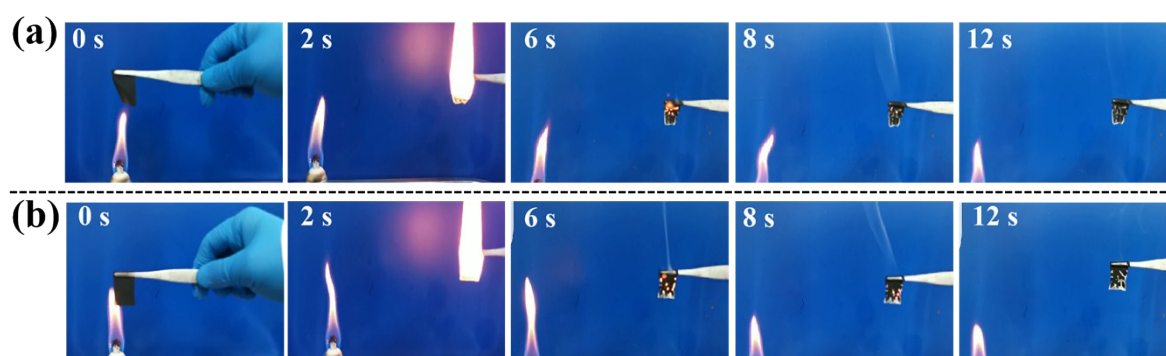

**Fig. S17** Digital images of the combustion process at different time of a) M-textile-6.7 and b) M-textile-12.3.

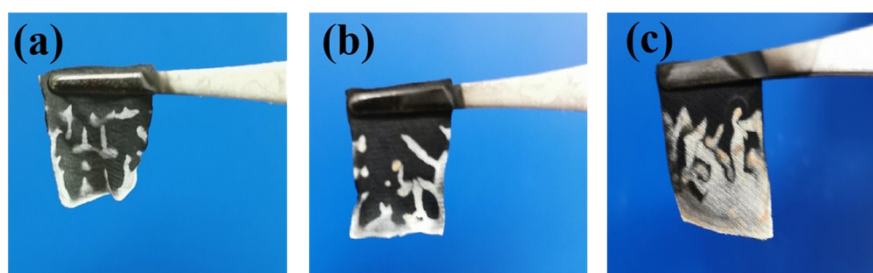

**Fig. S18** Digital images of textiles after burning: a) M-textile-6.7, b) M-textile-12.3 and c) M-textile-17.3, respectively.

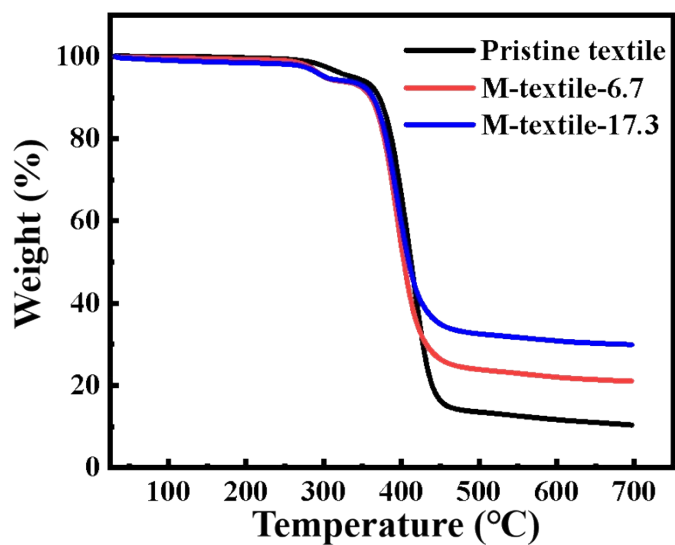

**Fig. S19** TG curves of pristine textile and M-textile with different MXene content, respectively.

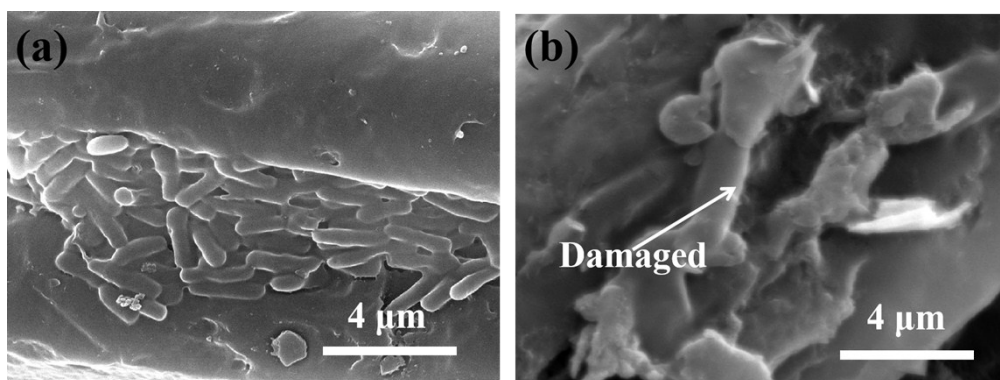

**Fig. S20** SEM images of the *B. subtilis* colonies grown on a) of pristine textile and b) M-textile-4.7.

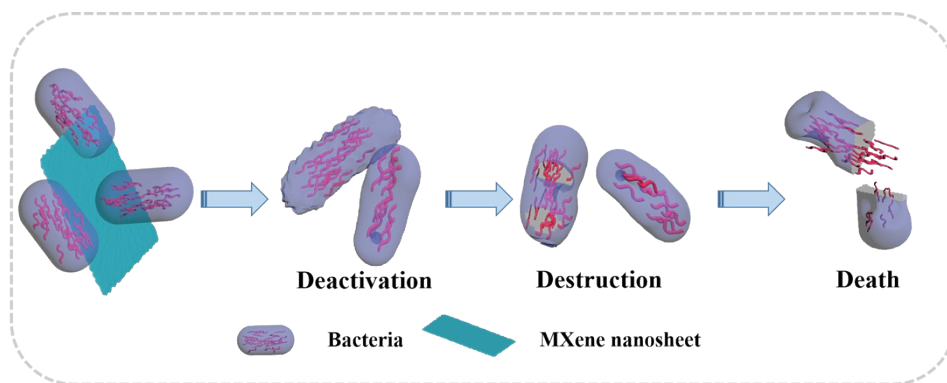

**Fig. S21** The antibacterial mode of M-textile.

**Table S1** Comparison of heating performance of the recently reported textile- and film-based wearable heaters. The references in this table correspond to those in the manuscript.

| Heaters       | Filler                                                | Matrix             | Sheet resistance ( $\Omega \text{ sq}^{-1}$ ) | Conductivity ( $\text{S m}^{-1}$ ) | Voltage (V) | Temperature ( $^{\circ}\text{C}$ ) | Ref.             |
|---------------|-------------------------------------------------------|--------------------|-----------------------------------------------|------------------------------------|-------------|------------------------------------|------------------|
| Film-based    | CuZr Metallic glasses                                 | PDMS               | 4                                             | /                                  | 7           | 180                                | 2                |
|               | AgNW                                                  | PVA                | 26                                            | /                                  | 5           | 74                                 | 3                |
|               | AgNW                                                  | Alumina            | 15                                            | /                                  | 6           | 98                                 | 7                |
|               | CuNi MESH                                             | PES                | /                                             | /                                  | 6           | 150                                | 8                |
|               | Graphene                                              |                    | /                                             | /                                  | 3.2         | 42                                 | 50               |
|               | Liquid-metal                                          | PDMS               | /                                             | $1.81 \times 10^6$                 | 3.5         | 95.9                               | 49               |
|               | CNT                                                   | TPU                | /                                             | 142.6                              | 6           | 65                                 | 44               |
|               | AgNW/SWCNT                                            | PDMS               | /                                             | /                                  | 5           | 87                                 | 45               |
|               | AgNW                                                  | Aramid Nanofibers  | 3.2                                           | /                                  | 5           | 103.5                              | 46               |
|               | CNT/FC                                                | Aramid Nanofiber   | /                                             | 230                                | 10          | 113.5                              | 47               |
|               | MWCNT                                                 |                    | 699                                           | /                                  | 15          | 77                                 | 48               |
| Textile-based | CuNW                                                  | PE Microfibers     | 2.5                                           | /                                  | 3           | 57                                 | 1                |
|               | CNT Fiber                                             |                    | /                                             | $7.4 \times 10^5$                  | 5           | 135                                | 5                |
|               | PEDOT                                                 | Cotton             | 61                                            | /                                  | 6           | 45                                 | 10               |
|               | MXene-PPy                                             | PET                | /                                             | 1000                               | 4           | 79                                 | 20               |
|               | Conductive Weft-knitted Fabric                        |                    | 1.89                                          | /                                  | 3.5         | 140                                | 51               |
|               | CNT Fiber                                             |                    | /                                             | 110                                | 1.5         | 47                                 | 52               |
|               | Silica NP/PDMS /AgNW                                  | Cotton             | 2.8~4                                         | /                                  | 0.5         | 34.1                               | 53               |
|               | Ag/Ni <sub>0.33</sub> Co <sub>0.67</sub> Se/PDMS /rGO | Woven Kevlar Fiber | /                                             | /                                  | 2.1         | 79                                 | 54               |
|               | <b>MXene</b>                                          | <b>PET</b>         | <b>19.7</b>                                   | <b>117</b>                         | <b>3.5</b>  | <b>174</b>                         | <b>This work</b> |
